# Supplementary material
Source: PubMed Central journal article supplement (PMC9342638)
Supplement: ASN.2021121605SupplementaryData1.pdf [file ASN.2021121605SupplementaryData1.pdf]

**Supplementary Table: advantages and caveats of the different clinical trials designs**

|                         | <b>Feature</b>                                                                                                                                                                                                                                                                                                                                                                                                                                                                     | <b>Advantages</b>                                                                                                                                                                                                                                                                                                                                                                                                                      | <b>Caveats</b>                                                                                                                                                                                                                                                                                                                                                                                                                                                                                                                                                                         |
|-------------------------|------------------------------------------------------------------------------------------------------------------------------------------------------------------------------------------------------------------------------------------------------------------------------------------------------------------------------------------------------------------------------------------------------------------------------------------------------------------------------------|----------------------------------------------------------------------------------------------------------------------------------------------------------------------------------------------------------------------------------------------------------------------------------------------------------------------------------------------------------------------------------------------------------------------------------------|----------------------------------------------------------------------------------------------------------------------------------------------------------------------------------------------------------------------------------------------------------------------------------------------------------------------------------------------------------------------------------------------------------------------------------------------------------------------------------------------------------------------------------------------------------------------------------------|
| <b>Pragmatic trials</b> | <b>Individualized randomization</b>                                                                                                                                                                                                                                                                                                                                                                                                                                                | Better control of randomization and balance between groups if a sufficient sample size is attained                                                                                                                                                                                                                                                                                                                                     | <ul style="list-style-type: none"> <li>- Higher cost</li> <li>- Might not be applicable to some interventions (e.g., bundles, educational procedures, emergent procedures)</li> <li>- Might introduce a selection bias in patients enrolled and decrease generalizability.</li> </ul>                                                                                                                                                                                                                                                                                                  |
|                         | <b>Cluster-level Interventions (randomization)</b>                                                                                                                                                                                                                                                                                                                                                                                                                                 | <ul style="list-style-type: none"> <li>- Allow the testing of interventions early in the course of disease management</li> <li>- Effective at evaluating community interventions</li> <li>- Allow assessment of more complex interventions</li> <li>- Cheaper to execute</li> <li>- Inclusion of a large number of patients</li> </ul>                                                                                                 | <ul style="list-style-type: none"> <li>- Risk of imbalance between groups due to differences in patient characteristics and care</li> <li>- Traditional informed consent is frequently infeasible</li> <li>- Lack of blinding</li> <li>- More complex statistical analysis,</li> <li>- Traditionally limited to interventions considered minimal risk</li> <li>- Confounding may also arise due to a lack of standardization of co-interventions (differences in “usual care”) between clusters</li> <li>- Statistically less powerful than individual patient-level trials</li> </ul> |
|                         | <b>Cross over cluster randomization</b>                                                                                                                                                                                                                                                                                                                                                                                                                                            | <ul style="list-style-type: none"> <li>- Reduces the impact of clustering as cluster participates in both the intervention and control arms, considerably improving statistical power</li> <li>- May be powered to detect small but clinically relevant treatment effects and evaluate heterogeneity of treatment effect</li> </ul>                                                                                                    | <ul style="list-style-type: none"> <li>- Prospective informed consent is frequently infeasible</li> <li>- Lack of blinding</li> <li>- More complex statistical analysis</li> <li>- Traditionally limited to interventions considered minimal risk</li> <li>- Susceptible to temporal biases, particularly if periods are long or the number of clusters is small</li> </ul>                                                                                                                                                                                                            |
|                         | <b>Stepped wedge cluster randomization</b>                                                                                                                                                                                                                                                                                                                                                                                                                                         | - Well-suited for interventions that cannot be easily removed or undone (e.g., provider education or implement a bundle of care to prevent AKI)                                                                                                                                                                                                                                                                                        | <ul style="list-style-type: none"> <li>- Risk of temporal bias due to irreversible practice changes over time</li> <li>- Traditional informed consent is frequently infeasible</li> <li>- Lack of blinding</li> <li>- Traditionally limited to interventions considered minimal risk.</li> <li>- Confounding may also arise due to a lack of standardization of “usual care”</li> </ul>                                                                                                                                                                                                |
| <b>Adaptive trials</b>  | <ul style="list-style-type: none"> <li>- Allows the stopping of an intervention as soon as futility, harm, or efficacy have been demonstrated, thereby improving efficiency, patient safety, and reducing costs</li> <li>- Allows optimization of an intervention during trial</li> <li>- Can be used to optimize eligibility criteria (enrichment)</li> <li>- Can be used to minimize the number of patients exposed to harmful/futile therapies (adaptive allocation)</li> </ul> | <ul style="list-style-type: none"> <li>- Budget planning and funding might be challenging to anticipate given the lack of a pre-defined sample size</li> <li>- Requires more statistical support for more frequent and complicated analyses</li> <li>- Requires more pre-trial planning to pre-specify all stopping/continuing rules</li> <li>- If changing allocation ratios, introduces the potential for temporal biases</li> </ul> |                                                                                                                                                                                                                                                                                                                                                                                                                                                                                                                                                                                        |

|                        |                                                                                                                                                                                                                                                                                                                                                                                                                      |                                                                                                                                                                                                                                                                                                                                                       |
|------------------------|----------------------------------------------------------------------------------------------------------------------------------------------------------------------------------------------------------------------------------------------------------------------------------------------------------------------------------------------------------------------------------------------------------------------|-------------------------------------------------------------------------------------------------------------------------------------------------------------------------------------------------------------------------------------------------------------------------------------------------------------------------------------------------------|
| <b>Platform trials</b> | <ul style="list-style-type: none"><li>- Increase efficiency compared to a traditional trial designs</li><li>- Reduces the cost to evaluate multiple interventions</li><li>- Improves the speed of trial conduct by avoiding repeated “start-up” and “close-out” periods</li><li>- Increases efficiency compared to a traditional trial design by using a single master protocol for multiple interventions</li></ul> | <ul style="list-style-type: none"><li>- Increases in overall complexity and logistics, particularly for designs that include adaptive features.</li><li>- May be challenging for institutional review boards and regulatory bodies to review and oversee.</li><li>- Costs may vary over-time and not align with traditional funding models.</li></ul> |
|------------------------|----------------------------------------------------------------------------------------------------------------------------------------------------------------------------------------------------------------------------------------------------------------------------------------------------------------------------------------------------------------------------------------------------------------------|-------------------------------------------------------------------------------------------------------------------------------------------------------------------------------------------------------------------------------------------------------------------------------------------------------------------------------------------------------|
